# Supplementary material
Source: PubMed Central journal article supplement (PMC5938117)
Supplement: NIHMS943919-supplement-2.pdf [file NIHMS943919-supplement-2.pdf]

| <b>Table S1A</b>          | <b>N</b>   | <b>Mean (Median)</b> | <b>S.D.</b> | <b>Range</b> |
|---------------------------|------------|----------------------|-------------|--------------|
| <b>Total</b>              | 507        |                      |             |              |
| <b>Gender, Female%</b>    | 59%        |                      |             |              |
| <b>Age</b>                |            | 76.8 (77.0)          | 7.46        | 51-95        |
| <b>With MMSE scores</b>   | 504        | 25.3 (27.0)          | 4.63        | 4-30         |
| <b>With APOE genotype</b> | 450        |                      |             |              |
| <b>ε4 - (%)</b>           | 272 (60.4) |                      |             |              |
| <b>MMSE scores</b>        |            | 25.6*                | 4.5         | 5-30         |
| <b>ε4 + (%)</b>           | 178 (39.6) |                      |             |              |
| <b>MMSE scores</b>        |            | 24.5                 | 5.0         | 4-30         |

\* $p < 0.05$  (t-test vs ε4)

| <b>Table S1B</b>       | <b>N</b>   | <b>MMSE (S.D.)</b>      | <b>NC</b>  | <b>MCI</b> | <b>DEM</b> |
|------------------------|------------|-------------------------|------------|------------|------------|
| <b>Total</b>           | 507        |                         | 253        | 131        | 120        |
| <b>MMSE cut-offs</b>   |            |                         | 27-30      | 24-26      | 23 $\geq$  |
| <b>Gender, Female%</b> |            |                         | 74.9       | 60.3       | 54.5       |
| <b>MMSE (S.D.)</b>     | 25.6 (7.4) |                         | 28.5 (1.1) | 25.2 (0.8) | 18.7(4.7)  |
| <b>ε4 - 0 (%)</b>      | 274 (60.4) | 25.6 (4.5)              | 146 (57.7) | 71 (54.2)  | 56 (46.7)  |
| <b>ε4 - 1 (%)</b>      | 161 (35.4) | 24.8 (4.3) <sup>#</sup> | 68 (26.9)  | 45 (34.4)  | 48 (40.0)  |
| <b>ε4 - 2 (%)</b>      | 19 (4.2)   | 22.0 (8.8)**            | 8 (3.2)    | 5 (3.8)    | 6 (5.0)    |

<sup>#</sup> $p = 0.0019$  and <sup>\*\*</sup> $p = 0.0019$  (t-test vs ε4 - 0)

**Table S1. Demographics of summarized MRI dataset obtained from NACC (A) overall (B) categorized by MMSE**
