# Supplementary material
Source: PubMed Central journal article supplement (PMC5938117)
Supplement: NIHMS943919-supplement-3.pdf [file NIHMS943919-supplement-3.pdf]

|                                                  | <b>Total</b> | <b>NC</b>    | <b>DEM</b>   | <b>AD</b>    |
|--------------------------------------------------|--------------|--------------|--------------|--------------|
| <b>N</b>                                         | 24           | 8            | 8            | 8            |
| <b>Mean Age, years (Range)</b>                   | 72.3 (55-86) | 72.5 (70-75) | 69.4 (55-86) | 75.0 (68-80) |
| <b>PMI, hours (S.D)</b>                          | 16.8 (5.3)   | 17.3 (3.9)   | 19.6 (3.8)   | 13.3 (7.4)   |
| <b>Gender, Female %</b>                          | 50           | 50           | 50           | 50           |
| <b>ε4 - 0 (%)</b>                                | 7 (29.2)     | 5 (62.5)     | 0 (0)        | 2 (25.0)     |
| <b>ε4 - 1 (%)</b>                                | 12 (50.0)    | 3 (37.5)     | 6 (75.0)     | 3 (37.5)     |
| <b>ε4 - 2 (%)</b>                                | 5 (20.8)     | 0 (0)        | 2 (25.0)     | 3 (37.5)     |
| <b>Cerebral atrophy (%)</b>                      |              |              |              |              |
| Normal/Unremarkable                              | 10 (41.6)    | 8 (100)      | 2 (25.0)     | 2 (25.0)     |
| Mild-Moderate                                    | 6 (25)       | 0 (0)        | 6 (75.0)     | 2 (25.0)     |
| Advanced                                         | 8 (33.3)     | 0 (0)        | 0 (0)        | 4 (50.0)     |
| <b>Neocortical neuronal loss (%)</b>             |              |              |              |              |
| Normal/Unremarkable                              | 8 (100)      | 8 (100)      | 7 (87.5)     | 0 (0)        |
| Mild-Moderate                                    | 0 (0)        | 0 (0)        | 0 (0)        | 0 (0)        |
| Advanced                                         | 0 (0)        | 0 (0)        | 1 (12.5)     | 8 (100)      |
| <b>Neocortical amyloid plaques (%)</b>           |              |              |              |              |
| Normal/Unremarkable                              | 13 (54.2)    | 6 (75.0)     | 7 (87.5)     | 0 (0)        |
| Mild-Moderate                                    | 2 (8.3)      | 2 (50.0)     | 0 (0)        | 0 (0)        |
| Advanced                                         | 9 (37.5)     | 0 (0)        | 1 (12.5)     | 8 (100)      |
| <b>Neocortical NFTs and neuritic plaques (%)</b> |              |              |              |              |
| Normal/Unremarkable                              | 13 (54.2)    | 6 (75.0)     | 7 (87.5)     | 0 (0)        |
| Mild-Moderate                                    | 2 (8.3)      | 2 (25.0)     | 0 (0)        | 0 (0)        |
| Advanced                                         | 9 (37.5)     | 0 (0)        | 1 (12.5)     | 8 (100)      |
| <b>Cerebral vascular atherosclerosis (%)</b>     |              |              |              |              |
| Normal/Unremarkable                              | 7 (29.2)     | 4 (50)       | 2 (25.0)     | 1 (12.5)     |
| Mild-Moderate                                    | 11 (45.8)    | 2 (25.0)     | 5 (62.5)     | 4 (50.0)     |
| Advanced                                         | 6 (25)       | 2 (25.0)     | 1 (12.5)     | 3 (37.5)     |

**Table S2A. Demographics and neuropathology summary of frontal cortex specimen obtained from NeuroBioBank**

| <b>Subject</b> | <b>Age</b> | <b>Sex</b> | <b>Neuropathology Diagnosis</b>               | <b>Neocortical amyloid plaques</b> | <b>Neocortical NFTs</b> |
|----------------|------------|------------|-----------------------------------------------|------------------------------------|-------------------------|
| NC-1           | 72         | F          | Unremarkable                                  | Unknown                            | Unknown                 |
| NC-2           | 73         | F          | Unremarkable                                  | Unknown                            | Unknown                 |
| NC-3           | 73         | F          | Unremarkable                                  | Unknown                            | Unknown                 |
| NC-4           | 70         | M          | Unremarkable                                  | Unremarkable                       | Unremarkable            |
| NC-5           | 70         | F          | Unremarkable                                  | Unknown                            | Unknown                 |
| NC-6           | 72         | M          | Unremarkable                                  | Unremarkable                       | Unremarkable            |
| NC-7           | 75         | M          | Unremarkable                                  | Mild                               | Mild                    |
| NC-8           | 75         | M          | Unremarkable                                  | Mild                               | Mild                    |
| DEM-1          | 59         | M          | Neuroacanthosis                               | Negative                           | Negative                |
| DEM-2          | 67         | M          | Lewy body dementia                            | Remarkable                         | Remarkable              |
| DEM-3          | 55         | F          | Brain pathology consistent with aging         | Negative                           | Negative                |
| DEM-4          | 83         | F          | Vascular dementia                             | Minimal                            | Negative                |
| DEM-5          | 72         | M          | Infarcts in the frontal lobe                  | Negative                           | Negative                |
| DEM-6          | 86         | F          | Dementia lacking distinct histologic features | Negative                           | Negative                |
| DEM-7          | 71         | F          | Progressive supranuclear palsy                | Negative                           | Negative                |
| DEM-8          | 62         | M          | Mini-stroke in brain stem                     | Negative                           | Negative                |
| AD-1           | 68         | M          | Alzheimer's                                   | Abundant                           | Abundant                |
| AD-2           | 70         | F          | Alzheimer's                                   | Abundant                           | Abundant                |
| AD-3           | 76         | F          | Alzheimer's                                   | Abundant                           | Abundant                |
| AD-4           | 80         | M          | Alzheimer's                                   | Abundant                           | Abundant                |
| AD-5           | 73         | F          | Alzheimer's                                   | Abundant                           | Abundant                |
| AD-6           | 78         | F          | Alzheimer's                                   | Abundant                           | Abundant                |
| AD-7           | 77         | M          | Alzheimer's                                   | Abundant                           | Abundant                |
| AD-8           | 78         | M          | Alzheimer's                                   | Abundant                           | Abundant                |

**Table S2B. Neuropathology diagnosis of each subject from NeuroBioBank**
