# Supplementary material
Source: PubMed Central journal article supplement (PMC5938117)
Supplement: NIHMS943919-supplement-4.pdf [file NIHMS943919-supplement-4.pdf]

| <i>Antibody</i>                                        | <i>Host</i>        | <i>Cellular target</i>                                           | <i>Application/Dilution</i>             | <i>Supplier source</i>    | <i>Cat#(Clone)</i> |
|--------------------------------------------------------|--------------------|------------------------------------------------------------------|-----------------------------------------|---------------------------|--------------------|
| <b>53BP1</b>                                           | Rabbit Polyclonal  | Marker of double strand breaks (DSB) damage in the nucleus       | ICC: 1:250                              | Abcam                     | ab36823 (N/A)      |
| <b>Cleaved caspase-3</b>                               | Mouse monoclonal   | Apoptotic cells                                                  | IHC: 1:250                              | EMD Millipore             | MAB10753 (3D9.3)   |
| <b>CyclinD1</b>                                        | Mouse monoclonal   | A marker for G1/S phase transition during cell cycle             | IHC: 1:250<br>ICC: 1:250                | Santa Cruz                | sc-450 (72-13G)    |
| <b>GAPDH</b>                                           | Mouse monoclonal   | Loading control for WB                                           | WB: 1:3000                              | Abcam                     | ab8245 (6C5)       |
| <b>GFAP</b>                                            | Rabbit polyclonal  | Activated astrocytes                                             | IHC: 1:500                              | Abcam                     | ab7260 (N/A)       |
| <b>MAP2</b>                                            | Chicken polyclonal | Neuronal/dendritic marker                                        | IHC: 1:2000                             | Abcam                     | ab5392 (N/A)       |
| <b>MBP</b>                                             | Mouse monoclonal   | Myelin basic protein; Myelin; Myelinating OL                     | IHC: 1:1000<br>ICC: 1:500<br>WB: 1:2000 | Covance                   | SMI-99P (SMI99)    |
| <b>MCT1</b>                                            | Chicken polyclonal | Endothelial cells of cerebral vessels and blood brain barrier    | IHC: 1:250                              | EMD Millipore             | AB1286-I           |
| <b>MyRF</b>                                            | Rabbit polyclonal  | Perinuclear region and nucleus of postmitotic and myelinating OL | IHC: 1:250                              | EMD Millipore             | ABN45 (N/A)        |
| <b>NG2</b>                                             | Rabbit polyclonal  | Marker of OL progenitor cells                                    | WB: 1:500                               | EMD Millipore             | AB5320 (N/A)       |
| <b>Olig2</b>                                           | Mouse monoclonal   | Pan-OL-specific nuclear transcription factor                     | IHC: 1:250<br>WB: 1:500                 | EMD Millipore             | MABN50 (211F1.1)   |
| <b>PCNA</b>                                            | Mouse monoclonal   | A marker for cell cycle progression                              | IHC: 1:250                              | Cell Signaling Technology | 2586 (PC10)        |
| <b>Phosphor-ATM at serine 1981</b>                     | Rabbit polyclonal  | Cells with activated ATM for DSB repair                          | IHC: 1:250                              | Abcam                     | ab81292 (EP1890Y)  |
| <b>Phosphor-<math>\gamma</math>H2A.X at serine 139</b> | Rabbit polyclonal  | Marker of double strand breaks (DSB) damage in the nucleus       | IHC: 1:250<br>ICC: 1:250                | Abcam                     | ab2893             |
| <b><math>\beta</math>-Amyloid</b>                      | Mouse monoclonal   | Amino acid residue 1-16 of beta amyloid or plaques               | IHC: 1:500                              | BioLegend®                | 803001 (6E10)      |

**Table S3. Primary antibodies for immunocytochemistry and immunoblotting**

IHC: Immunohistochemistry; ICC: Immunocytochemistry; WB: Western blotting
