# Supplementary material
Source: PubMed Central journal article supplement (PMC5938117)
Supplement: NIHMS943919-supplement-5.pdf [file NIHMS943919-supplement-5.pdf]

| <b>Table S4A. qPCR primers for human genes</b> |                          |                                               |                         |                         |
|------------------------------------------------|--------------------------|-----------------------------------------------|-------------------------|-------------------------|
| <b>Gene symbol</b>                             | <b>GenBank Reference</b> | <b>Name of encoding protein</b>               | <b>Forward Primer</b>   | <b>Reverse Primer</b>   |
| 18S                                            | X03205.1                 | 18s Ribosomal protein                         | CGGCTACCACATCCAAGGAA    | GCTGGAATTACCGCGGCT      |
| ABCA1                                          | NM_005502                | ATP-binding cassette, sub-family A , member 1 | ACATCCTGAAGCCAATCCTGA   | CTCCTGTGCGATGTCACTCC    |
| ABCG1                                          | NM_207174                | ATP-binding cassette, sub-family G member 1   | GGGGTCGCTCCATCATTG      | TTCCCCGGTACACACATTGTC   |
| ACTB                                           | NM_001101                | Beta-actin                                    | CATGTACGTTGCTATCCAGGC   | CTCCTTAATGTCACGCACGAT   |
| APOB                                           | NM_000384                | Apolipoprotein B                              | ACACACTGGACGCTAAGAGGA   | ACTTGTGCTACCATCCCATACT  |
| APOE                                           | NM_000041                | Apolipoprotein E                              | GTTGCTGGTCACATTCCTGG    | GCAGGTAATCCCAAAAGCGAC   |
| APP                                            | NM_201414                | Amyloid precursor protein                     | CAAGCAGTGCAAGACCCATC    | AGAAGGGCATCACTTACAAACTC |
| ATM                                            | NM_000051                | A-T mutated protein                           | TTGATCTTGTGCCTTGGCTAC   | TATGGTGTACGTTCCCATGT    |
| ATR                                            | NM_001184                | A-T and Rad3 related protein                  | TCCCTTGAATACAGTGGCCTA   | TCCTTGAAAGTACGGCAGTTC   |
| BACE1                                          | NM_138971                | Beta-secretase 1                              | ACCAACCTTCGTTTGCCCAA    | TCTCCTAGCCAGAAACCATCAG  |
| BACE2                                          | NM_138991                | Beta-secretase 2                              | AGACACGTACTTTGACACAGAGA | TGGGGATGGTGACGAGGTC     |
| CASP3                                          | NM_004346                | Caspase-3                                     | GAAATTGTGGAATTGATGCGTGA | CTACAACGATCCCCTCTGAAAAA |
| CCNA1                                          | NM_003914                | Cyclin A1                                     | ACATGGATGAACTAGAGCAGGG  | GAGTGTGCCGGTGTCTACTT    |
| CCNA2                                          | NM_001237                | Cyclin A2                                     | TGGAAAGCAAACAGTAAACAGCC | GGGCATCTTCACGCTCTATTT   |
| CCNB1                                          | NM_031966                | Cyclin B1                                     | AATAAGGCGAAGATCAACATGGC | TTTGTTACCAATGTCCCAAGAG  |
| CCNB2                                          | NM_004701                | Cyclin B2                                     | TGCTCTGCAAAATCGAGGACA   | GCCAATCCACTAGGATGGCA    |
| CCND1                                          | NM_053056                | Cyclin D1                                     | TGGAGCCCGTGAAAAAGAGC    | TCTCCTCATCTTAGAGGCCAC   |
| CCND2                                          | NM_001759                | Cyclin D2                                     | CTGTCTCTGATCCGCAAGCAT   | GGTGGGTACATGGCAAACCTAAA |
| CCND3                                          | NM_001760                | Cyclin D3                                     | TACCCGCCATCCATGATCG     | AGGCAGTCCACTTCAGTGC     |
| CCNE1                                          | NM_001238                | Cyclin E1                                     | GCCAGCCTTGGGACAATAATG   | CTTGACGTTGAGTTTGGGT     |
| CCNE2                                          | NM_057749                | Cyclin E2                                     | TCAAGACGAAGTAGCCGTTTAC  | TGACATCCTGGGTAGTTTTCTC  |
| CCNH                                           | NM_001239                | Cyclin H                                      | TGTTCCGGTGTAAAGCCAGCA   | TCCTGGGGTGATATTCCATTACT |

|        |              |                                                |                         |                          |
|--------|--------------|------------------------------------------------|-------------------------|--------------------------|
| CDK4   | NM_000075    | Cyclin-dependent kinase 4                      | TCAGCACAGTTCGTGAGGTG    | GTCCATCAGCCGGACAACAT     |
| CDK5   | NM_004935    | Cyclin dependent kinase 5                      | GGGCCAAGCTGTACTCCAC     | ACATCATTGCCGGGAAAAAGAG   |
| CDK5R1 | NM_003885    | P35 protein/CDK5 Receptor                      | AGCAGCTACCAGAACAACATC   | GGGCGAATGTGGACAGGTT      |
| CDK6   | NM_001145306 | Cyclin-dependent kinase 6                      | TCTTCATTCACACCGAGTAGTGC | TGAGGTTAGACCATCTGGAAA    |
| CDK7   | NM_001799    | Cyclin-dependent kinase 7                      | GGAGCCCCAATAGAGCTTATACA | TCCACACCTACACCATACATCC   |
| CNPase | NM_033133    | Marker for immature and mature OL, but not OPC | CTGCTAGAGTGCAAGACGCTC   | GTGCCATCACGGTACTTGTCC    |
| CSPG4  | NM_001897    | Chondroitin sulfate proteoglycans 4. a.k.a NG2 | GCCACGTTGTCAGTCGATG     | CCCATAGGGGACCTCTAGGG     |
| E2F1   | NM_005225    | E2F transcription factor 1                     | ACGTGACGTGTCAGGACCT     | GATCGGGCCTTGTGCTCTT      |
| E2F2   | NM_004091    | E2F transcription factor 2                     | CGTCCTGAGTTCCCAACC      | GCGAAGTGCATACCGAGTCTT    |
| E2F3   | NM_001949    | E2F transcription factor 3                     | AGAAAGCGGTCATCAGTACCT   | TGGACTTCGTAGTGCAGCTCT    |
| E2F4   | NM_001950    | E2F transcription factor 4                     | CCTAGCTGTACGCCAGAAGC    | TTTTTCTCGATTAGCCCGATACC  |
| ERCC1  | NM_202001    | Excision repair cross-complementation group 1, | CCTTATTCCGATCTACACAGAGC | TATTCGGCGTAGGTCTGAGGG    |
| ERCC2  | NM_001130867 | Excision repair cross-complementation group 2  | AGAAGGTGATTGAAGAGCTTCG  | ACCTCAGGGTGAATACACAAGT   |
| ERCC3  | NM_000122    | Excision repair cross-complementation group 3  | CTAACTGCCTACTCCTTGATGC  | TCCATAGCTGACAGTACACAACCT |
| ERCC4  | NM_005236    | Excision repair cross-complementation group 4  | GGAAGTCTCGACACTGACG     | GCGAGGGAGGTGTTCAACTC     |
| ERCC5  | NM_000123    | Excision repair cross-complementation group 5  | GACAAGCCATCAAACTGCCT    | AACTTGGGTAAGACTGGGTAGT   |
| ERCC6  | NM_000124    | Excision repair cross-complementation group 6  | GTGGAGAAGGAGTATCGGTCCG  | GTGGCAGCTTGAGGGCTAAG     |
| ERCC8  | NM_000082    | Excision repair cross-complementation group 8  | AGCAAACACTGCTCATAATGGG  | GAACTATTCCAGAGCCTCATTCCG |
| GAPDH  | NM_001256799 | Hypoxanthine Phosphoribosyltransferase 1       | ACAACTTTGGTATCGTGAAGG   | GCCATCACGCCACAGTTTC      |
| GFAP   | NM_001242376 | Glial fibrillary acidic protein                | AGGTCCATGTGGAGCTTGAC    | GCCATTGCCTCATACTGCCT     |
| GSK3B  | NM_002093    | Glycogen synthase kinase 3 beta                | AGACGCTCCCTGTGATTTATGT  | CCGATGGCAGATTCCAAAGG     |
| HDAC1  | NM_004964    | Histone deacetylase 1                          | CCGCATGACTCATAATTTGCTG  | ATTGGCTTTGTGAGGGCGATA    |
| HDAC3  | NM_003883    | Histone deacetylase 3                          | GCAAGGCTTCACCAAGAGTCT   | AGATGCGCCTGTGTAACGC      |

|        |              |                                                                                        |                         |                         |
|--------|--------------|----------------------------------------------------------------------------------------|-------------------------|-------------------------|
| HDAC4  | NM_006037    | Histone deacetylase 4                                                                  | GGCCACCGAATCTGAAC       | GAACTCTGGTCAAGGGAAGTCTG |
| HDAC5  | NM_001015053 | Histone deacetylase 5                                                                  | TCTTGTGCGAAGTCAAAGGAGC  | GAGGGGAAGTCTGGTCCAAAG   |
| HDAC6  | NM_006044    | Histone deacetylase 6                                                                  | ACCCAGTGTCTCTATTCTC     | CCTGGTCCAAGGCACATTGA    |
| HDAC7  | NM_001098416 | Histone deacetylase 7                                                                  | TGCCAGTCTTAATGACCAC     | CACCTGGACGTGAGTTTTGAG   |
| HDAC9  | NM_058176    | Histone deacetylase 9                                                                  | GAATCCTCAGTCAGTAGCAGTTC | GGGGCAAACCGAAGTCTCAT    |
| LDLR   | NM_001195800 | Low density lipoprotein receptor                                                       | ACCAACGAATGCTTGGACAAC   | ACAGGCACTCGTAGCCGAT     |
| LRP1   | NM_002332    | Low density lipoprotein receptor-related protein 1 (APOER)                             | AGCCAGCTATGCACCAACAC    | CCTTGCAGGAGCGGTTATC     |
| LRP1B  | NM_018557    | Low density lipoprotein receptor-related protein 1B                                    | GTGCAACAAATGGCGATTGAC   | GACACATACAGAACCGTTGGAAT |
| LRP2   | NM_004525    | Low density lipoprotein receptor-related protein 2 (megalin)                           | TATCCCTCGTGCTTATGTCTGT  | TGAACTGGTAACCACCGCAG    |
| LRP4   | NM_002334    | Low density lipoprotein receptor-related protein 4                                     | ACCTACCTGTTCCCTCTTGA    | GTCCTGCTCATCCGAGTCATC   |
| LRP8   | NM_033300    | Low density lipoprotein receptor-related protein 8, apolipoprotein e receptor (APOER2) | CCCATCCCTAATCTTCACCAAC  | CTAGTGCCACGACATTCTTGAG  |
| LXRA   | NM_001251934 | NR1H3 mRNA for liver X receptor alpha, complete cds                                    | CCTTCAGAACCACAGAGATCC   | ACGCTGCATAGCTCGTTCC     |
| LXRB   | NM_007121    | NR1H2 mRNA for liver X receptor beta, complete cds                                     | GTGGACTTCGCTAAGCAAGTG   | ATGATCTCGATAGTGGATGCCT  |
| MAG    | NM_002361    | Myelin associated glycoprotein                                                         | GGTGTCTGGTACTTCAATAGCC  | CTCTCGTGGACTACTTGGGTG   |
| MAP2   | NM_001039538 | Microtubule associated protein 2                                                       | CTCAGCACCGCTAACAGAGG    | CATTGGCGCTTCGGACAAG     |
| MBP    | X17289       | Myelin basic protein                                                                   | GTCCCTGAGCAGATTTAGCTG   | GAATCCCTTGTGAGCCGATTT   |
| MRE11A | NM_005590    | MRE11 homolog A                                                                        | ATCGGCCTGTCCAGTTTGAAA   | TGCCATCTTGATAGTTCACCCAT |
| MyRF   | NM_013279    | Myelin regulatory factor                                                               | CAGTCCCAGTCAGACCGGA     | CCCTTCTTACGCATGTTGTTAGC |
| NBN    | NM_002485    | Nijmegen Breakage Syndrome 1                                                           | CACTCACCTTGTATGGTATCAG  | CTGCTTCTTGGACTCAACTGC   |
| NeuN   | NM_001082575 | RBFOX3 RNA binding protein                                                             | TCGTAGAGGGACGGAAAATTGA  | GCCGTTGGTGTAGGGGTTCT    |
| NKx2.2 | NM_002509    | NK2 homeobox 2; OL-transcription factor                                                | CCGGGCCGAGAAAGGTATG     | GTTTGCCGTCCCTGACCAA     |

|        |              |                                                  |                         |                         |
|--------|--------------|--------------------------------------------------|-------------------------|-------------------------|
| Olig1  | NM_138983    | Oligodendrocyte transcription factor 1           | TACTATGCGGTTTCCCAGGC    | GCTGAGTAGGGCAGGATGA     |
| OLIG2  | NM_005806    | Oligodendrocyte transcription factor 2           | CCAGAGCCCGATGACCTTTTT   | CACTGCCTCCTAGCTTGTC     |
| PCNA   | NM_002592    | Proliferating cell nuclear antigen               | GCGTGAACCTCACCAGTATGT   | TCTTCGGCCCTTAGTGAATGAT  |
| PDRGRa | NM_006206    | Platelet derived growth factor receptor $\alpha$ | TTTTTGTGACGGTCTTGGAAGT  | TGTCTGAGTGTGGTTGAATAGC  |
| PLP1   | NM_001128834 | Proteolipid protein 1                            | ACCTATGCCCTGACCGTTG     | TGCTGGGGAAGGCAATAGACT   |
| PMP22  | NM_153321    | Peripheral myelin protein 22                     | GATCCTGTCGATCATCTTCAGC  | AGCACTCATCACGCACAGAC    |
| PSD95  | NM_001365    | PSD95                                            | CACAACCTCTTATCCCAGCAC   | CATGGCTGTGGGGTAGTCG     |
| PSEN1  | NM_000021    | Presenilin-1; a.k.a gamma-secretase 1            | TGGCTACCATTAAGTCAGTCAGC | CCCACAGTCTCGGTATCTTCT   |
| PSEN2  | NM_012486    | Presenilin-2; a.k.a gamma-secretase 2            | CTGACCCTATGTCTGTAGTGG   | CTTCGCTCCGTATTTGAGGGT   |
| RAD50  | NM_005732    | RAD50 Homolog                                    | TTTGTTGGACCCAATGGGG     | CAGGAGGGAAATCTCCAGTACAA |
| RXRA   | NM_002957    | Retinoid X receptor, alpha                       | GACGGAGCTTGTGTCCAAGAT   | AGTCAGGGTTAAAGAGGACGAT  |
| RXRB   | NM_021976    | Retinoid X receptor, beta                        | ACGGCTATGTGCAATCTGC     | CGGATGGTGCCTTTGAAGAA    |
| S100B  | NM_006272    | S100 calcium binding protein B                   | TGGCCCTCATCGACGTTTTTC   | ATGTTCAAAGAACTCGTGGCA   |
| SOX 2  | NM_003106    | SRY-box 2                                        | GCCGAGTGAAACTTTTGTGCG   | GGCAGCGTGTACTTATCCTTCT  |
| SOX10  | NM_006941    | SRY-box 10                                       | CCTCACAGATCGCTACACC     | CATATAGGAGAAGGCCGAGTAGA |
| Syn I  | NM_006950    | Synapsin I                                       | AGTTCTTCGGAATGGGGTGAA   | CAAACCTGCGGTAGTCTCCGTT  |
| Syn II | NM_133625    | Synapsin II                                      | CGACTTCCAGGACATTGCCAG   | AGCCTTGTAGTTGTTGCCAATC  |
| TP53   | NM_001126118 | Tumor protein p53                                | CAGCACATGACGGAGGTTGT    | TCATCCAAATACTCCACACGC   |
| TUBB3  | NM_006086    | TUBB3 tubulin beta 3 class III                   | GGCCAAGGGTCACTACACG     | GCAGTCGCAGTTTTCACACTC   |
| VLDLR  | NM_001018056 | Very low density lipoprotein receptor            | CTGGGTATGCGACGATGATG    | CTTGGTGTGTATGACTGGCTG   |
| XPA    | NM_000380    | Xeroderma Pigmentosum, Complementation Group A   | CCAGGACCTGTTATGGAATTTGA | GCTTCTTGACTACCCCAAACCTC |
| XPC    | NM_001145769 | Xeroderma Pigmentosum, Complementation Group C;  | TTGACCCGGCTGGTATTGTC    | GTGCCCTTAGCAAAGGTTTCC   |

|       |           |                                            |                          |                         |
|-------|-----------|--------------------------------------------|--------------------------|-------------------------|
| XRCC1 | NM_006297 | X-ray repair cross-complementing protein 1 | TGTGGTCCTACAGTTGGAGAA    | AAACATGCGAACGCGGTTG     |
| XRCC4 | NM_022406 | X-ray repair cross-complementing protein 4 | ATGTTGGTGAAGTGAAGAAAAGCA | GCAATGGTGTCCAAGCAATAAC  |
| XRCC5 | NM_021141 | X-ray repair cross-complementing protein 5 | GCACTGACAATCCCCTTTCTG    | TCAATGCCTCCAGCAAATCAAA  |
| XRCC6 | NM_001469 | X-ray repair cross-complementing protein 6 | GCTAGAAGACCTGTTGCGGAA    | TGTTGAGCTTCAGCTTTAACCTG |

| <b>Table S4B. qPCR primers for mouse genes</b> |                          |                                                                                       |                         |                         |
|------------------------------------------------|--------------------------|---------------------------------------------------------------------------------------|-------------------------|-------------------------|
| <b>Gene symbol</b>                             | <b>GenBank Reference</b> | <b>Name of encoding protein</b>                                                       | <b>Forward Primer</b>   | <b>Reverse Primer</b>   |
| Nefl                                           | NM_010910.1              | Neurofilament, light polypeptide                                                      | GGTGCTGAGATTTATGGAGGC   | ATGGTTCCGATGCTGTAGGT    |
| Map2                                           | NM_001310634.1           | Microtubule-associated protein 2                                                      | GCCAGCCTCGGAACAAACA     | GCTCAGCGAATGAGGAAGGA    |
| Syn1                                           | NM_013680.4              | Synapsin I                                                                            | AGCTCAACAAATCCCAGTCTCT  | CGGATGGTCTCAGCTTTCAC    |
| Cspg4                                          | NM_139001.2              | Chondroitin sulfate proteoglycan 4 a.k.a NG2                                          | GAAGAAGCAAGTCCTGTTTG    | CGTGAAGATAGGGTTCTGAG    |
| Pdgfra                                         | NM_001083316.2           | Platelet derived growth factor receptor, alpha polypeptide                            | GGAAGGACTGGAAGCTTGGGGC  | GAGATGAGGCCCGGCCCTGTGA  |
| Cnpase                                         | NM_001146318.1           | 2',3'-cyclic nucleotide 3' phosphodiesterase                                          | GTTCTGAGACCTCCGAAAA     | CCTTGGGTTTCATCTCCAGAA   |
| Mbp                                            | NM_001025251.2           | Myelin basic protein                                                                  | CCCGTGGAGCCGTGATC       | TCTCAAACGAAAAGGGA       |
| Plp1                                           | NM_011123.3              | Proteolipid protein (myelin) 1                                                        | GCCCCTACCAGACATCTAGC    | AGTCAGCCGCAAAACAGACT    |
| Myrf                                           | NM_001033481.1           | Myelin regulatory factor                                                              | GCATGGGCACCGCCCCTAAG    | GGGGCGAGTCTGGCAGTGTG    |
| Sox10                                          | NM_011437.1              | SRY (sex determining region Y)-box 10                                                 | TGGACCGCACACCTTGGGACA   | ACGCCACCTCTCCGACCT      |
| Atm                                            | NM_007499.2              | Ataxia telangiectasia mutated                                                         | AAACTTTGGTTTACTTGAGGCCA | AAGGACTAGAAGGTTTACAGGCT |
| Atr                                            | NM_019864.1              | Ataxia telangiectasia and Rad3 related                                                | GAATGGGTGAACAATACTGCTGG | TTTGGTAGCATACTGGCGA     |
| Rad50                                          | NM_009012.2              | RAD50 double strand break repair protein                                              | TGATAAGTTGTCTTGGGGTTTCC | CTGTGTCTGACGCACCTGT     |
| Nbn                                            | NM_013752.3              | Nibrin                                                                                | GATCAGTCAATCAGTCGAAACCA | CCAAGGGCTCGTATTCTACTCTG |
| Mre                                            | NM_018736.3              | MRE11A homolog A                                                                      | TGGGTGAACTACCAGGATGG    | CCCCGTGGGATCATCATGG     |
| Ercc1                                          | NM_001127324.1           | Excision repair cross-complementing rodent repair deficiency, complementation group 1 | TTCGGTGAGGTGATTCCCGAT   | GATGGAGGTTGTGGTAGCGG    |
| Ercc2                                          | NM_007949.4              | Excision repair cross-complementing rodent repair deficiency, complementation group 2 | TACTCAGCTTCTACGAGCAGC   | GCTCAGAGCCAGTCTAAGAAC   |
| Ercc3                                          | NM_133658.1              | Excision repair cross-complementing rodent repair deficiency, complementation group 3 | GCACCAAAGTGGATGAGTATGG  | AGAAGGCTTCCAAGAAAATGTGG |
| Ercc4                                          | NM_015769.2              | Excision repair cross-complementing rodent repair deficiency, complementation group 4 | CCATTCGACAAGACAATCCGC   | ACACCTTCTCTGTTGCTCTCA   |

|       |                |                                                                                       |                         |                         |
|-------|----------------|---------------------------------------------------------------------------------------|-------------------------|-------------------------|
| Ercc5 | NM_011729.2    | Excision repair cross-complementing rodent repair deficiency, complementation group 5 | TGCTGGCCGTGGATATTAGC    | GCCGGTGAATAATGTGAGAAGA  |
| Ercc6 | NM_001081221.1 | Excision repair cross-complementing rodent repair deficiency, complementation group 6 | GAGACCACAGAGAAACGTCCA   | CTCCTGCTCACTGGTTTGCT    |
| Ercc8 | NM_028042.3    | Excision repair cross-complementing rodent repair deficiency, complementation group 8 | GAGCCCGTTGAAGGAAGATAC   | GGCGTTCTCAAGGTCATAGAGTA |
| Gapdh | NM_008084.3    | Glyceraldehyde-3-phosphate dehydrogenase                                              | AGGTCATCCCAGAGCTGAACG   | TCAGATGCCTGCTTCACCAC    |
| 18s   | NR_003278.3    | 18S ribosomal RNA                                                                     | CGGCTACCACATCCAAGGAA    | GCTGGAATTACCGCGGCT      |
| XRCC4 | NM_022406      | X-ray repair cross-complementing protein 4                                            | ATGTTGGTGAAGTGAAGAAAGCA | GCAATGGTGTCCAAGCAATAAC  |
| XRCC5 | NM_021141      | X-ray repair cross-complementing protein 5                                            | GCACTGACAATCCCCTTTCTG   | TCAATGTCTCCAGCAAATCAAA  |
| XRCC6 | NM_001469      | X-ray repair cross-complementing protein 6                                            | GCTAGAAGACCTGTTGCGGAA   | TGTTGAGCTTCAGCTTTAACCTG |

**Supplementary Table 4: List of primers for qPCR**
